# Supplementary material for: Role of bicarbonate as a pH buffer and electron sink in microbial dechlorination of chloroethenes
Source: PubMed Central journal article supplement (PMC3511292; doi:10.1186/1475-2859-11-128), 2012-09-13
Supplement: 1475-2859-11-128-S2.pdf [file 1475-2859-11-128-S2.pdf]

**Additional file 2 – Time course pH measurements**

Average pH values with standard deviations of triplicate cultures containing 2.5, 5, 10, and 30

mM  $\text{HCO}_3^-$  as the sole buffer and a combination of  $\text{HCO}_3^-$  and HEPES. The values in bold are the final pH measurements.

| Day | $[\text{HCO}_3^-]$ mM |                    |                    |                    |                    |                    |                    |                    |
|-----|-----------------------|--------------------|--------------------|--------------------|--------------------|--------------------|--------------------|--------------------|
|     | 2.5                   | 2.5 & HEPES        | 5                  | 5 & HEPES          | 10                 | 10 & HEPES         | 30                 | 30 & HEPES         |
| 0   | 7.49 ± 0.06           | 7.48 ± 0.08        | 7.47 ± 0.05        | 7.51 ± 0.07        | 7.54 ± 0.05        | 7.46 ± 0.04        | 7.44 ± 0.03        | 7.43 ± 0.03        |
| 1   | 7.41 ± 0.07           | 7.43 ± 0.08        | 7.45 ± 0.07        | 7.51 ± 0.04        | 7.56 ± 0.03        | 7.45 ± 0.06        | 7.45 ± 0.09        | 7.50 ± 0.02        |
| 7   | 7.23 ± 0.05           | 7.38 ± 0.09        | 7.37 ± 0.06        | 7.44 ± 0.09        | 7.66 ± 0.18        | 7.47 ± 0.06        | 7.56 ± 0.07        | 7.58 ± 0.03        |
| 17  | 7.29 ± 0.03           | 7.26 ± 0.12        | 7.36 ± 0.03        | 7.48 ± 0.12        | 7.87 ± 0.11        | 7.53 ± 0.04        | 7.60 ± 0.11        | 7.60 ± 0.03        |
| 19  | –                     | 7.58 ± 0.01        | –                  | <b>7.61 ± 0.09</b> | –                  | –                  | –                  | –                  |
| 20  | –                     | –                  | –                  | –                  | –                  | –                  | –                  | –                  |
| 23  | 7.81 ± 0.06           | –                  | 7.92 ± 0.09        | –                  | 8.12 ± 0.11        | –                  | –                  | –                  |
| 26  | –                     | <b>7.62 ± 0.09</b> | –                  | –                  | –                  | 7.64 ± 0.01        | 7.68 ± 0.09        | 7.65 ± 0.01        |
| 28  | –                     | –                  | –                  | –                  | –                  | <b>7.76 ± 0.05</b> | –                  | –                  |
| 32  | <b>7.97 ± 0.20</b>    | –                  | –                  | –                  | –                  | –                  | –                  | <b>7.80 ± 0.04</b> |
| 35  | –                     | –                  | <b>8.55 ± 0.20</b> | –                  | 8.73 ± 0.10        | –                  | 8.07 ± 0.19        | –                  |
| 40  | –                     | –                  | –                  | –                  | <b>8.71 ± 0.19</b> | –                  | <b>8.13 ± 0.17</b> | –                  |
